# Supplementary material for: Synthesis, Characterization, and Antifungal Activity of Silver Nanoparticles Embedded in Pullulan Matrices
Source: MDPI journal article supplement (doi:10.3390/ma14227041), 2021-11-20
Supplement: s1 [file s1]

## Article

# Synthesis, Characterization, and Antifungal Activity of Silver Nanoparticles Embedded in Pullulan Matrices

Olga Burduniuc <sup>1,2,\*</sup>, Andra-Cristina Bostanaru <sup>3</sup>, Mihai Mares <sup>3,\*</sup>, Gabriela Biliuta <sup>4,\*</sup> and Sergiu Coseri <sup>4,\*</sup>

<sup>1</sup> “Nicolae Testemitanu” State University of Medicine and Pharmacy, 165, Stefan cel Mare blvd., MD 2001 Chisinau, Moldova

<sup>2</sup> National Public Health Agency, 67A Gheorghe Asachi, MD 2028 Chisinau, Moldova

<sup>3</sup> Laboratory of Antimicrobial Chemotherapy, Faculty of Veterinary Medicine, “Ion Ionescu de la Brad” University of Life Sciences (IULS), 8 Mihail Sadoveanu Alley, 700489 Iasi, Romania; acbostanaru@uaiasi.ro

<sup>4</sup> “Petru Poni” Institute of Macromolecular Chemistry, 41A Grigore Ghica Voda Alley, 700487 Iasi, Romania

\* Correspondence: olga.burduniuc@ansp.gov.md (O.B.); mycomedica@gmail.com (M.M.); biliuta.gabriela@icmpp.ro (G.B.); coseris@icmpp.ro (S.C.)

**Citation:** Burduniuc, O.; Bostanaru, A.-C.; Mares, M.; Biliuta, G.; Coseri, S. Synthesis, Characterization, and Antifungal Activity of Silver Nanoparticles Embedded in Pullulan Matrices. *Materials* **2021**, *14*, 7041. <https://doi.org/10.3390/ma14227041>

Academic Editor: Anna Karewicz

Received: 25 October 2021

Accepted: 16 November 2021

Published: 20 November 2021

**Publisher’s Note:** MDPI stays neutral with regard to jurisdictional claims in published maps and institutional affiliations.

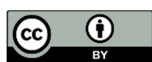

**Copyright:** © 2021 by the authors. Licensee MDPI, Basel, Switzerland. This article is an open access article distributed under the terms and conditions of the Creative Commons Attribution (CC BY) license (<http://creativecommons.org/licenses/by/4.0/>).

### Nuclear magnetic resonance spectroscopy

Nuclear Magnetic Resonance (NMR) Spectroscopy spectra were realized with a Bruker-Avance DR X 400 MHz Spectrometer, equipped with a 5 mm QNP direct detection probe and z-gradients. Solutions in D<sub>2</sub>O of pullulan and oxidized pullulan using tetramethylsilane TMS ( $\delta = 0$  ppm) as internal standard were used to record the <sup>13</sup>C-NMR spectra.

The oxidation is clearly seen by <sup>13</sup>C-NMR. The presence of the C signal at 175 ppm, characteristic for the -COOH groups, reveal that the oxidation process at primary -OH groups was occurred.

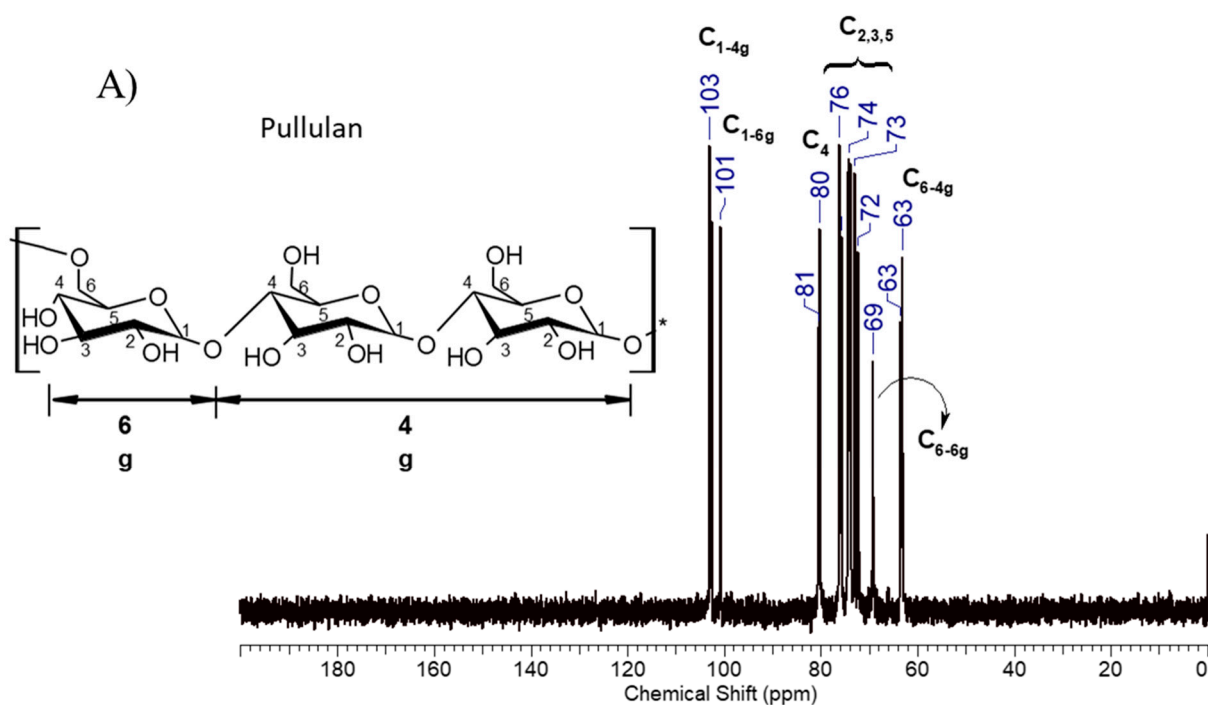

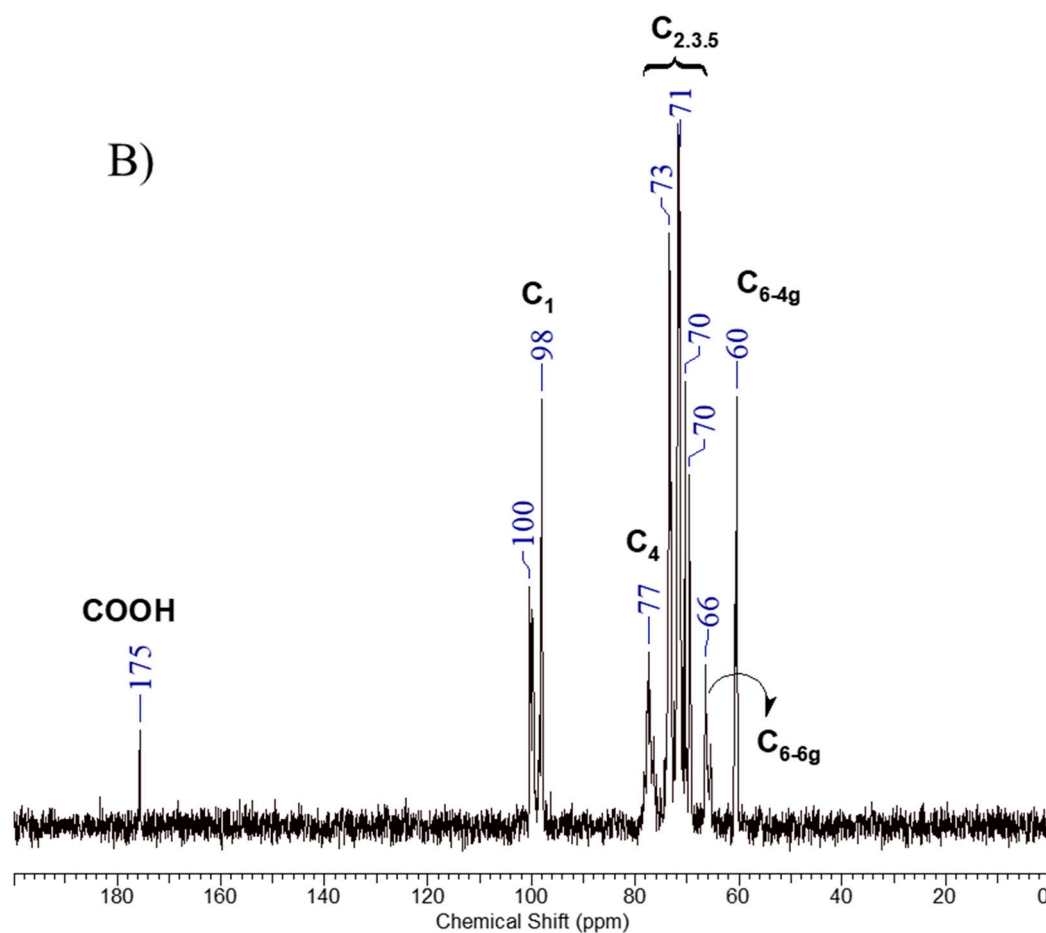

**Figure S1.**  $^{13}\text{C}$ -NMR spectra of the pullulan before oxidation (A) and the pullulan obtained after oxidation in the presence of the TEMPO/NaClO/NaBr (B).

#### UV-visible spectrophotometer measurements

The AgNPs prepared by using pullulan or oxidized pullulan were characterized by using ultraviolet-visible (UV-vis) spectroscopy. The optical absorption properties of AgNPs samples were measured using a SPECORD 200 Analytik Jena spectrometer over the range of 300 – 700 nm. The effect of the reducing/stabilizing agent on the AgNPs formation is illustrated by recording the UV-Vis spectra, **Figure S2**. It is well known that silver nanoparticles absorb radiation in the visible region of the electromagnetic spectrum (380–450 nm) due to the SPR transition.

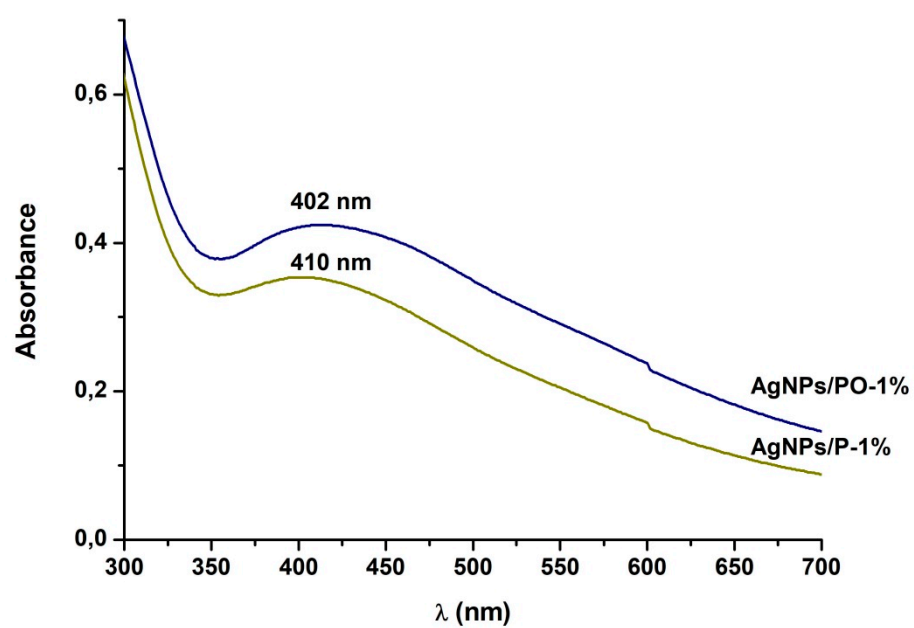

**Figure S2.** The UV-Vis spectra of the silver nanoparticles (pullulan: AgNPs/P-1% and oxidized pullulan: AgNPs/PO-1%) during synthesis, at room temperature.
